# Supplementary material
Source: PubMed Central journal article supplement (PMC11028273)
Supplement: 262_2017_2095_MOESM1_ESM.pdf [file 262_2017_2095_MOESM1_ESM.pdf]

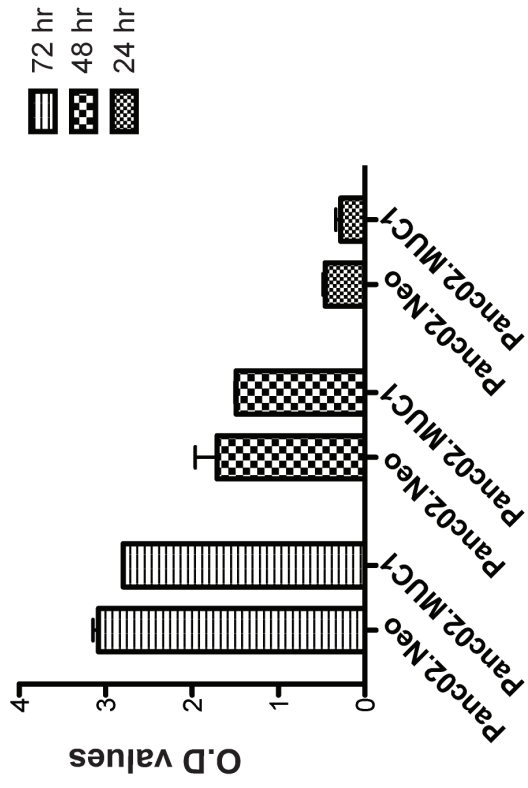

**Supplementary Figure 1:** MTT based proliferation assay for Panc02.Neo and Panc02.MUC1 cells at different time points.  $p > 0.05$ , two-way ANOVA using the Bonferroni correction for multiple comparison.

**Supplementary Figure.1**

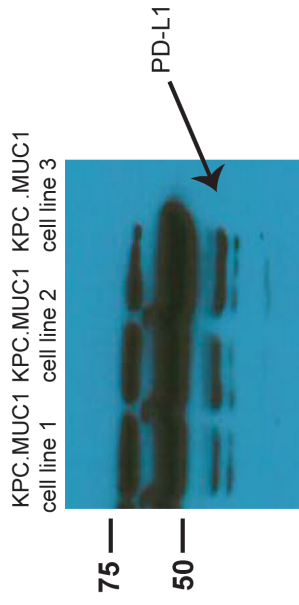

**Supplementary Figure 2:** Representative blot depicts PD-L1 (50 kDa) expression in different KPC mouse-derived pancreatic cancer cell lines used for mice studies.

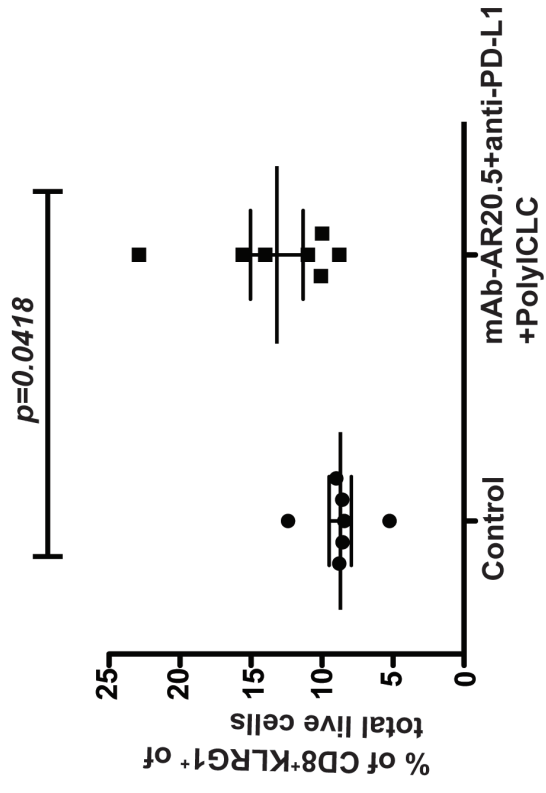

**Supplementary Figure 3:** Histogram plot demonstrates the frequency of activated CD8 T cells (CD8<sup>+</sup>KLRG1<sup>+</sup> T cells) post 30 days of tumor cell challenge in different treatment groups. (n=7/group), unpaired t-test.

Gated on CD3, (CD4<sup>-</sup> CD8<sup>-</sup> CD3<sup>+</sup> DN T cells)

mAb-AR20.5+anti-PD-L1+PolyICLC

Control

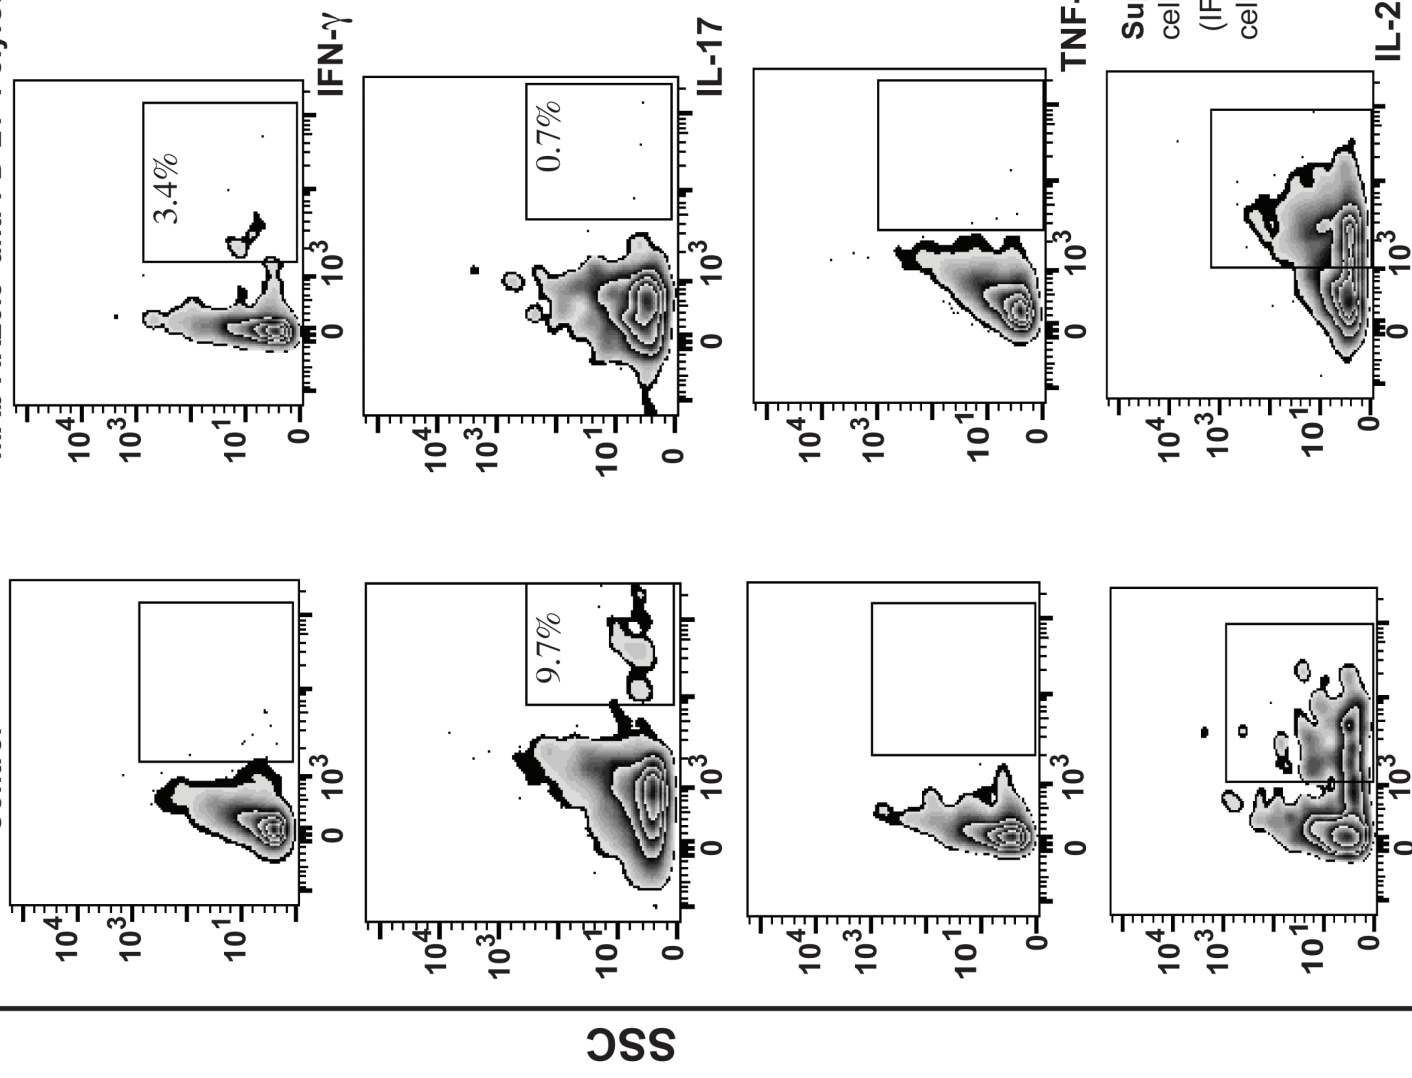

**Supplementary Figure 4:** Cytokine analysis of CD3<sup>+</sup> DN T cells. Representative FACS plot display cytokine (IFN- $\gamma$ , IL-17, TNF- $\alpha$ , IL-2) production by circulating CD3<sup>+</sup> DN T cells derived from different treatment groups (n=4 mice/gp).

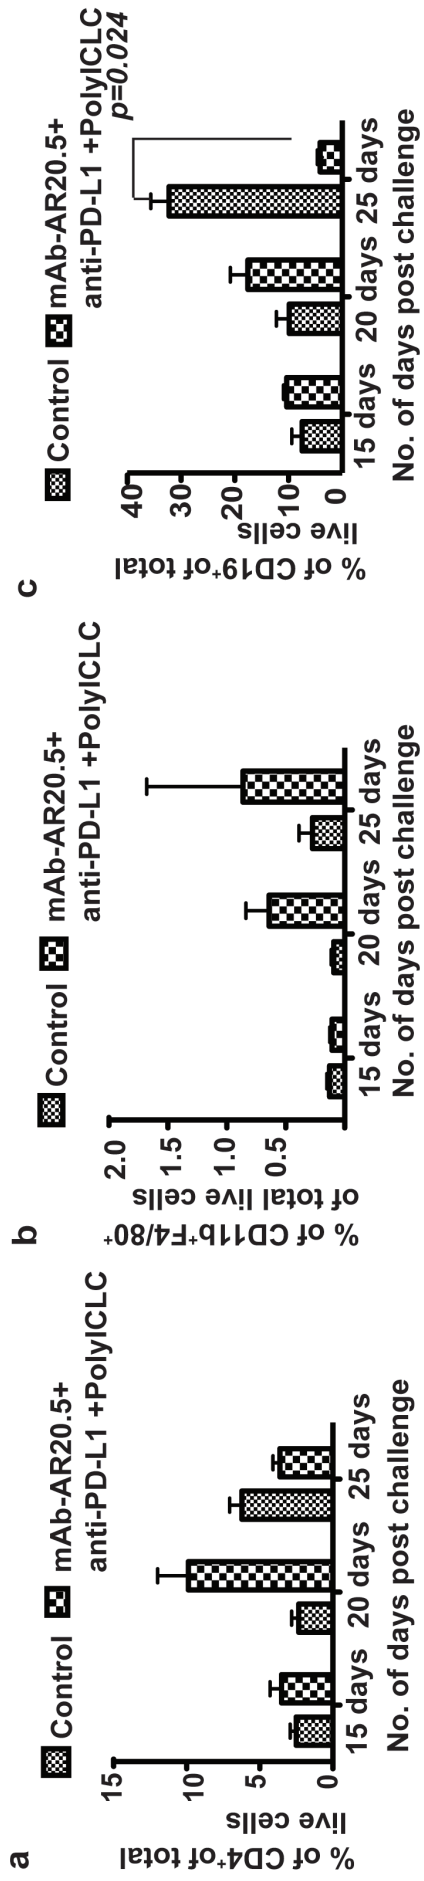

**Supplementary Figure 5:** Circulating levels of activated CD4, macrophage (F4/80), and CD19+ cells in different treatment groups. **a-c** Histogram plot demonstrates the frequency of CD4+ T cells ( $p>0.05$ , two-way ANOVA) (**a**), macrophages (CD11b+F4/80) ( $p>0.05$ , two-way ANOVA) (**b**) and CD19+ cells (**c**) at different days in saline control and mAb-AR20.5+anti-PD-L1+PolyICLC treated tumor-bearing mice. (n=5/group), two-way ANOVA using the Bonferroni correction for multiple comparison.

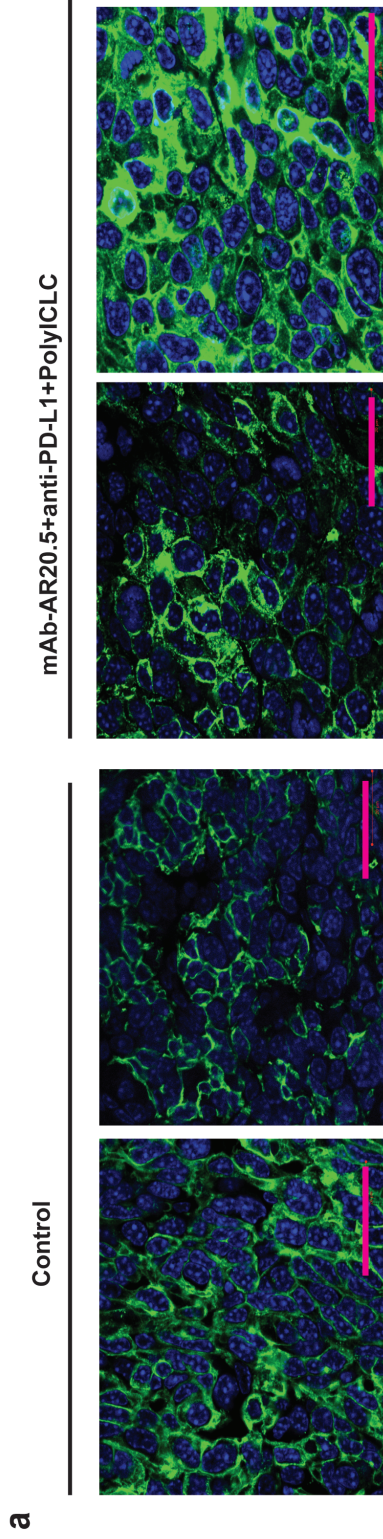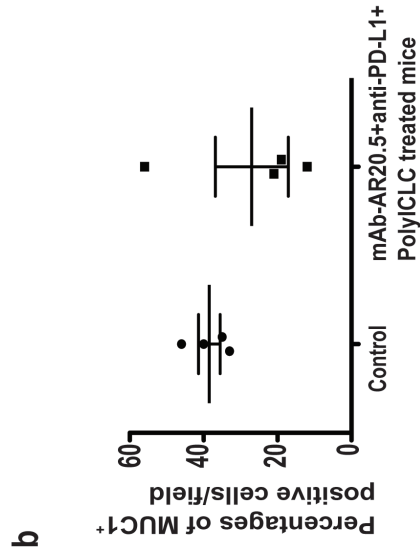

**Supplementary Figure 6** : MUC1 expression in subcutaneous tumors remains unchanged post second tumor cell challenge in tumor-bearing MUC1.Tg mice. **a** Representative immunofluorescence images showing human MUC1 expression in tumor sections (4 mice/gp) derived from MUC1.Tg mice treated with saline or combination regimen (mAb-AR20.5+anti-PD-L1+Poly/ICLC) (scale bar 50µm). **b** Representative histogram depicts the percentages of MUC1 positive tumor cells per selected tumor field in different treatment groups. MUC1 positive tumor cells were found statistical insignificant between the treated groups ( $p > 0.05$ , unpaired t-test). Images (60X) were quantified using image J software (n=4 (4 areas/tissue section)).

**Supplementary Figure. 6**

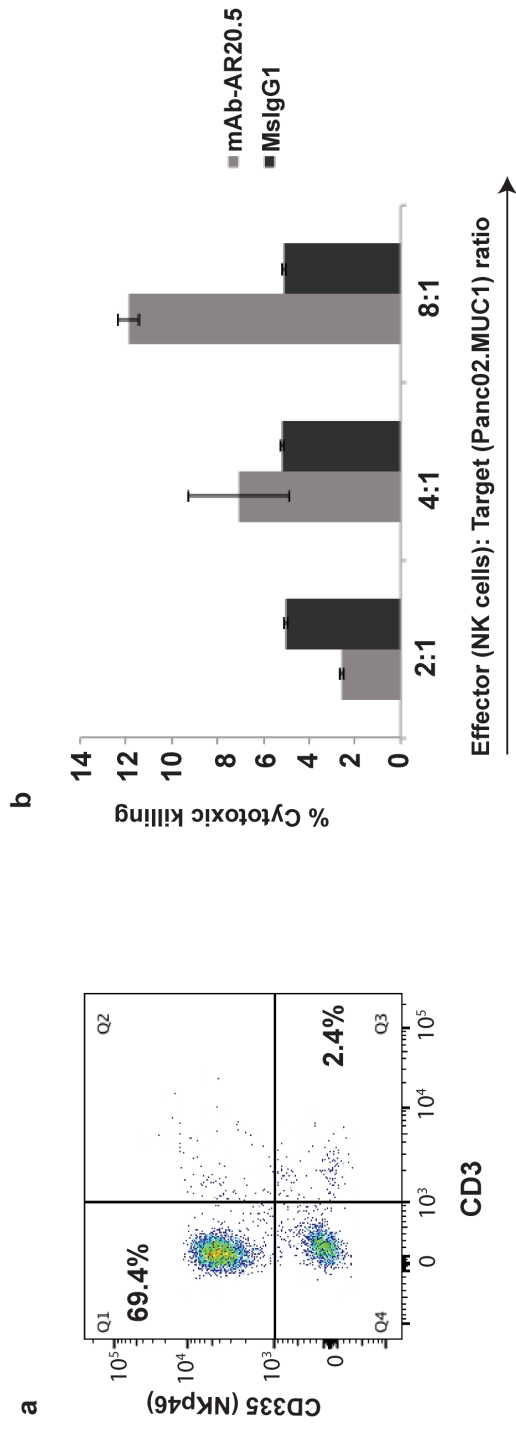

**Supplementary Figure 7** : mAb-AR20.5 shows mild cytotoxicity activity against Panc02.MUC1 cells. **a** Representative plot demonstrate NK cell-enriched population post magnetic sorting (magnetic kit from Milteny Biotech) of mouse splenocytes. **b** Representative histogram shows CFSE-based ADCC assay for mAb-AR20.5 (80µg) and MslgG1 (80µg) by using splenic NK cells as effector and Panc02.MUC1 as target cells. Experiment was performed twice and results are expressed as Mean ±SEM.  $p > 0.05$ , two-way ANOVA.

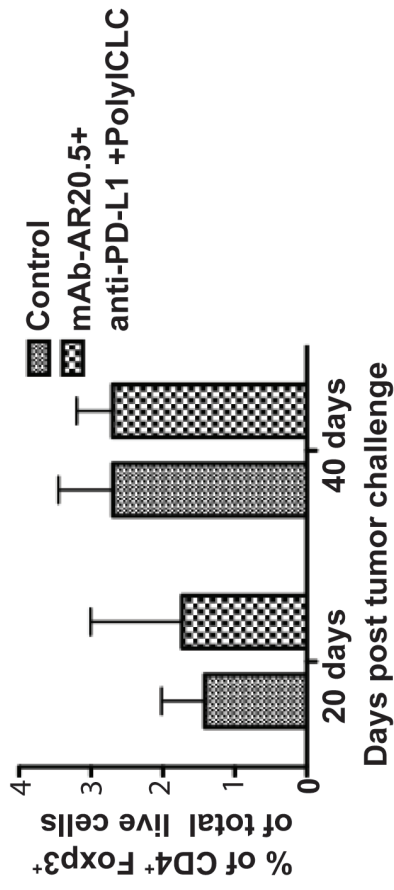

**Supplementary Figure 8** : Circulating levels of Foxp3<sup>+</sup> CD4<sup>+</sup> regulatory T cells between different treatment groups. Representative histogram depicts circulating Tregs population, which are indistinguishable between control (1<sup>st</sup> challenge) and mAb-AR20.5-based combination treated mice (2<sup>nd</sup> challenge) with Panc02.MUC1 tumor cells.  $p > 0.05$ , unpaired t-test.
